# Supplementary material for: Quantitative Perfusion Analysis of First-Pass Contrast Enhancement Kinetics: Application to MRI of Myocardial Perfusion in Coronary Artery Disease
Source: PLoS One. 2016 Sep 1;11(9):e0162067. doi: 10.1371/journal.pone.0162067 (PMC5008793; doi:10.1371/journal.pone.0162067)
Supplement: S1 File — Average MBF and MPRI values were calculated in each region of LAD, RCA, and LCX, using NTHf and AATH methods. Stenosis [%] indicates the severity of coronary artery stenosis determined from the invasive coronary angiography examination by a cardiologist after the procedure and expressed as a percent reduction in vessel diameter. (XLSX) [file pone.0162067.s001.xlsx]

## Sheet: MBF
	hct	Age	Sex	Body weight [kg]	BMI	smoker	FOV	in-plane resolution	TE	temporal resolution	rest HR [beats/min]	stress HR	Rest Systolic BP [mm Hg]	rate-pressure product	Diastolic BP		Stenosis [%]				Fb rest (average)			Fb rest (endo)			Fb rest (epi)			Fb stress			Fb stress (endo)			Fb stress (epi)			MPRI			MPRI (endo)			MPRI (epi)
NTHf																# seg (LAD/RCA/LCX)	Left Main	LAD (sector 1,2)	RCA (sector 3,4)	LCX (sector 5,6)	LAD (sector 1,2)	RCA (sector 3,4)	LCX (sector 5,6)	LAD (sector 1,2)	RCA (sector 3,4)	LCX (sector 5,6)	LAD (sector 1,2)	RCA (sector 3,4)	LCX (sector 5,6)	LAD (sector 1,2)	RCA (sector 3,4)	LCX (sector 5,6)	LAD (sector 1,2)	RCA (sector 3,4)	LCX (sector 5,6)	LAD (sector 1,2)	RCA (sector 3,4)	LCX (sector 5,6)	LAD (sector 1,2)	RCA (sector 3,4)	LCX (sector 5,6)	LAD (sector 1,2)	RCA (sector 3,4)	LCX (sector 5,6)	LAD (sector 1,2)	RCA (sector 3,4)	LCX (sector 5,6)
Patient 1	0.372	72	M	78.9	31	N	350x315	1.1x1.1	1.23	138.5	58	75	149	8642	70	6,6,8	0	25 (mid), 20 (proximal, diag1)	20 (ostial)	20 (proximal, marg1)	1.34571	1.11652	1.32214	1.30364	1.23584	1.25925	1.38778	0.997207	1.38503	1.95867	1.73257	1.92821	1.83663	1.58776	1.69305	2.08071	1.87739	2.16336	1.45549	1.55176	1.4584	1.40884	1.28476	1.34449	1.49931	1.88265	1.56196
Patient 2	0.409	47	M	97.9	34	Y	350x315	1.1x1.1	1.23	149.9	50	60	112	5600	64	10,8,10	0	0	0	0	0.753125	0.723485	0.713558	0.828263	0.890259	0.908257	0.677988	0.55671	0.518858	1.10947	1.03051	0.97758	1.15277	1.13792	1.04153	1.06618	0.923107	0.913633	1.47316	1.42438	1.37001	1.39179	1.27819	1.14673	1.57256	1.65815	1.76085
Patient 3	0.462	65	M	70	24	N	350x315	1.1x1.1	1.23	114.2	66	80	173	11418	83	12,10,10	85 (ostial)	90 (ostial), 70 (mid)	70 (mid), 40 (distal)	luminal irregularities	1.00396	0.906534	1.02321	1.0892	0.94233	1.18909	0.918716	0.870739	0.85733	0.728006	0.95265	1.25032	0.514913	0.711571	1.05767	0.941099	1.19373	1.44298	0.725135	1.05087	1.22196	0.472743	0.755119	0.889477	1.02436	1.37094	1.68311
Patient 4	0.411	66	M	103	32	N	400x340	1.25x1.25	1.23	144.6	62	86	117	7254	69	12,10,10	0	30 (proximal), 30 (mid), 100 (proximal, Diag 1)	30 (mid), 100 (tubular proximal, RT PAV)	80 (mid)	0.600242	0.539646	0.595266	0.670885	0.547688	0.586698	0.529599	0.531604	0.603834	0.849846	0.519025	0.809747	0.890301	0.501601	0.776477	0.809392	0.536449	0.843016	1.41584	0.961788	1.36031	1.32705	0.915852	1.32347	1.52831	1.00911	1.39611
Patient 5	0.352	83	F	80.2	25	N	340x289	1.06x1.06	1.25	145.8	75	87	163	12225	83	10,8,10	0	0	0	0	0.983631	1.01571	0.907376	1.06597	1.06888	0.935363	0.901294	0.962543	0.879389	1.63439	1.67249	1.269	1.74694	1.77634	1.37331	1.52184	1.56863	1.16469	1.66158	1.64662	1.39854	1.63882	1.66187	1.46821	1.6885	1.62968	1.32444
Patient 6	0.464	65	M	90	29	N	390x331	1.23x1.23	1.2	141.5	63	85	114	7182	64	10,6,8	0	40 (distal), 30 (mid)	0	30 (mid)	0.555293	0.55226	0.667019	0.51897	0.549144	0.670659	0.591615	0.555376	0.66338	1.05292	1.05208	0.995265	1.09714	1.12666	1.08044	1.00869	0.977487	0.910086	1.89614	1.90504	1.49211	2.11406	2.05167	1.61102	1.70498	1.76005	1.37189
Patient 7	0.441	50	F	64	25	N	350x297	1.1x1.1	1.23	144	61	75	159	9699	96	12,10,10	0	75 (mid)	70 (proximal), 75 (distal), 70 (ostial, RT PDA)	75 (ostial)	0.755638	0.68105	0.721302	0.809704	0.702534	0.767332	0.701572	0.659566	0.675273	1.25349	1.14179	1.1056	1.33786	1.1482	1.12348	1.16912	1.13539	1.08772	1.65885	1.67651	1.53278	1.65228	1.63436	1.46414	1.66642	1.72141	1.61078
Patient 8	0.41	46	M	120.7	35	N	350x297	1.1x1.1	1.23	188.8	43	75	120	5160	81	12,10,10	0	30 (mid)	70 (right PDA)	0	0.398368	0.52757	0.478746	0.438042	0.556497	0.462201	0.358695	0.498643	0.495292	0.882805	0.955963	0.748547	0.880385	0.990254	0.796053	0.885225	0.921671	0.701042	2.21605	1.81201	1.56356	2.00982	1.77944	1.72231	2.46791	1.84836	1.41541
																					0.823782	0.726352	0.771802	0.866768	0.778134	0.818444	0.780797	0.674569	0.72516	1.28889	1.03993	0.623515	1.30907	1.00448	0.508257	1.26872	1.07538	0.738774	1.60806	1.46614	0.843462	1.5809	1.35317	0.694298	1.66417	1.60318	1.01674
																					0.300444	0.167387	0.328318	0.301011	0.207002	0.382908	0.319508	0.136177	0.273729	0.408733	0.172521	0.147772	0.353046	0.206952	0.00941266	0.482937	0.210456	0.286131	0.242102	0.253902	0.167339	0.306653	0.365825	0.313325	0.280726	0.163427	0.0107832
		Age	Sex	Body weight [kg]		smoker	FOV	in-plane resolution	TE	temporal resolution	rest HR [beats/min]	stress HR	Rest Systolic BP [mm Hg]	rate-pressure product	Diastolic BP		Stenosis [%]				Fb rest (average)			Fb rest (endo)			Fb rest (epi)			Fb stress			Fb stress (endo)			Fb stress (epi)			MPRI			MPRI (endo)			MPRI (epi)
AATH																# seg (LAD/RCA/LCX)	Left Main	LAD (sector 1,2)	RCA (sector 3,4)	LCX (sector 5,6)	LAD (sector 1,2)	RCA (sector 3,4)	LCX (sector 5,6)	LAD (sector 1,2)	RCA (sector 3,4)	LCX (sector 5,6)	LAD (sector 1,2)	RCA (sector 3,4)	LCX (sector 5,6)	LAD (sector 1,2)	RCA (sector 3,4)	LCX (sector 5,6)	LAD (sector 1,2)	RCA (sector 3,4)	LCX (sector 5,6)	LAD (sector 1,2)	RCA (sector 3,4)	LCX (sector 5,6)	LAD (sector 1,2)	RCA (sector 3,4)	LCX (sector 5,6)	LAD (sector 1,2)	RCA (sector 3,4)	LCX (sector 5,6)	LAD (sector 1,2)	RCA (sector 3,4)	LCX (sector 5,6)
Patient 1	0.372	72	M	78.9	31	N	350x315	1.1x1.1	1.23	138.5	58	75	149	8642	70	6,6,8	0	25 (mid), 20 (proximal, diag1)	20 (ostial)	20 (proximal, marg1)	1.2301	1.11059	1.19668	1.23592	1.15765	1.17061	1.22428	1.06352	1.22275	1.67842	1.46371	1.65001	1.67961	1.45151	1.53264	1.67724	1.47592	1.76738	1.36446	1.31796	1.37882	1.35899	1.25384	1.30927	1.36997	1.38776	1.44541
Patient 2	0.409	47	M	97.9	34	Y	350x315	1.1x1.1	1.23	149.9	50	60	112	5600	64	10,8,10	0	0	0	0	0.724132	0.774102	0.746603	0.768163	0.865373	0.866572	0.6801	0.68283	0.626634	1.11784	1.08282	0.958791	1.17911	1.15609	1.02814	1.05657	1.00956	0.88944	1.54369	1.39881	1.28421	1.53497	1.33594	1.18645	1.55355	1.47849	1.41939
Patient 3	0.462	65	M	70	24	N	350x315	1.1x1.1	1.23	114.2	66	80	173	11418	83	12,10,10	85 (ostial)	90 (ostial), 70 (mid)	70 (mid), 40 (distal)	luminal irregularities	0.948701	0.867139	1.01177	1.00029	0.885423	1.08593	0.897112	0.848855	0.937612	0.76251	0.951299	1.15413	0.582502	0.748391	1.06395	0.942518	1.15421	1.24432	0.803741	1.09705	1.14071	0.582333	0.845236	0.979763	1.05061	1.35972	1.32712
Patient 4	0.411	66	M	103	32	N	400x340	1.25x1.25	1.23	144.6	62	86	117	7254	69	12,10,10	0	30 (proximal), 30 (mid), 100 (proximal, Diag 1)	30 (mid), 100 (tubular proximal, RT PAV)	80 (mid)	0.67704	0.596879	0.67361	0.720239	0.615672	0.673955	0.633841	0.578087	0.673265	0.838198	0.517632	0.771109	0.864569	0.494034	0.754569	0.811827	0.541231	0.787649	1.23803	0.867231	1.14474	1.20039	0.802431	1.11961	1.2808	0.936245	1.16989
Patient 5	0.352	83	F	80.2	25	N	340x289	1.06x1.06	1.25	145.8	75	87	163	12225	83	10,8,10	0	0	0	0	0.923279	0.943335	0.840612	0.9782	0.997393	0.887743	0.868358	0.889277	0.793481	1.1792	1.22545	1.02126	1.21399	1.25193	1.07257	1.1444	1.19897	0.969955	1.27718	1.29906	1.2149	1.24105	1.2552	1.20819	1.31789	1.34825	1.2224
Patient 6	0.464	65	M	90	29	N	390x331	1.23x1.23	1.2	141.5	63	85	114	7182	64	10,6,8	0	40 (distal), 30 (mid)	0	30 (mid)	0.606184	0.560252	0.719505	0.588794	0.568032	0.746279	0.623573	0.552473	0.692731	1.00119	0.979061	0.891684	1.03558	1.02206	0.9353	0.966809	0.936062	0.848068	1.65163	1.74754	1.2393	1.75881	1.7993	1.25329	1.55043	1.69431	1.22424
Patient 7	0.441	50	F	64	25	N	350x297	1.1x1.1	1.23	144	61	75	159	9699	96	12,10,10	0	75 (mid)	70 (proximal), 75 (distal), 70 (ostial, RT PDA)	75 (ostial)	0.744657	0.695478	0.697481	0.781577	0.713989	0.746693	0.707737	0.676967	0.648269	1.09746	1.03936	0.979751	1.16158	1.05498	0.996988	1.03335	1.02374	0.962514	1.47378	1.49445	1.4047	1.4862	1.47758	1.3352	1.46007	1.51225	1.48474
Patient 8	0.41	46	M	120.7	35	N	350x297	1.1x1.1	1.23	188.8	43	75	120	5160	81	12,10,10	0	30 (mid)	70 (right PDA)	0	0.443318	0.584353	0.504444	0.459947	0.60242	0.517398	0.426688	0.566286	0.491491	0.799076	0.894346	0.70819	0.786701	0.946316	0.752264	0.811452	0.842376	0.664116	1.80249	1.53049	1.4039	1.71042	1.57086	1.45394	1.90174	1.48754	1.35123
																					0.808795	0.743941	0.77279	0.843434	0.776278	0.80798	0.774157	0.711604	0.7376	1.12548	0.965707	0.640071	1.14982	0.948917	0.538268	1.10114	0.982498	0.741875	1.42314	1.3155	0.835486	1.40426	1.25186	0.692382	1.44751	1.38527	0.993429
																					0.248146	0.134328	0.248775	0.250203	0.149483	0.271965	0.252391	0.121759	0.225585	0.293637	0.129787	0.173155	0.26599	0.149819	0.0625561	0.326321	0.164512	0.283753	0.189428	0.179158	0.044894	0.213208	0.260243	0.155632	0.183316	0.121542	0.0808711
